# Supplementary material
Source: publisher figshare collection journal article supplement (https://gsapubs.figshare.com/ndownloader/files/23307125)
Supplement: Supplementary file 1 [file 23307125]

## Sheet: Appendix VII data
Table DR7: Rutile U-Pb data
Sample	Analysis number	Grain number	206Pb (cps)	207Pb (cps)	208Pb (cps)	232Th (cps)	238U (cps)	Data for Tera-Wasserburg plot				Ages (Ma)				207Pb/206Pb-corrected 206Pb/238U age		Screening
								238U/206Pb	± 2σ	207Pb/206Pb	± 2σ	207Pb/206Pb	± 2σ	206Pb/238U	± 2σ	Age (Ma)	± 2σ
SJ8	86	87	320	17.1	-7	286	522000	1349.53	78.3127	0.05	0.023	-270	700	4.77	0.27	4.7518	0.308744	5		1	Failed	Discarded
SJ8	59	60	264	58	68	4.2	329300	1036.27	89.1299	0.216	0.048	2360	560	6.22	0.54	4.88127	0.567554	5		2	207Pb-corr. age > 100 Ma, uncertainty > 10 %	Discarded
SJ8	3	4	497	179	328	501	513000	888.889	72.6914	0.304	0.053	2950	420	7.25	0.59	4.88289	0.637118	5		3	207Pb-corr. age 10-100 Ma, uncertainty > 20 %	Discarded
SJ8	122	20	269	18	-6	1290	397900	1223.99	107.867	0.058	0.028	-160	780	5.27	0.46	5.18572	0.493517	5		4	207Pb-corr. age < 10 Ma, uncertainty > 25 %	Discarded
SJ8	134	87	316	33	63	230	457400	1165.5	99.1627	0.095	0.045	340	880	5.53	0.47	5.18697	0.542242	5		5	All other ages	Accepted
SJ8	135	87	381	66	121	4930	487700	1041.67	82.4653	0.173	0.034	2070	430	6.19	0.49	5.1927	0.491465	5
SJ8	139	99	345	197	407	1520	187400	444.444	37.5309	0.545	0.062	4270	190	14.5	1.2	5.34197	1.28375	5
SJ8	123	20	225	3.6	-5	570	340400	1236.09	99.3153	0.023	0.037	-1900	1200	5.21	0.42	5.36589	0.495384	5
SJ8	125	20	300	14	22	7240	428100	1172.33	87.9593	0.056	0.038	-700	870	5.5	0.41	5.42807	0.48545	5
SJ8	19	20	345	23.4	19	1060	472600	1153.4	90.4629	0.067	0.029	90	750	5.58	0.44	5.43935	0.473269	5
SJ8	133	87	462	110	221	3300	516100	921.659	57.763	0.221	0.033	2850	340	6.99	0.44	5.44391	0.453764	5
SJ8	126	20	391	60	122	15600	480200	993.049	69.0302	0.161	0.037	1760	490	6.49	0.45	5.54544	0.492379	5
SJ8	131	60	296	50	125	20	344000	966.184	76.5479	0.17	0.042	2090	580	6.67	0.53	5.62362	0.570989	5
SJ8	124	20	478	118	248	9690	498900	843.17	68.2499	0.226	0.038	2760	360	7.64	0.62	5.90221	0.607125	5
SJ8	120	4	691	402	935	5790	311000	362.319	28.8805	0.568	0.046	4390	130	17.8	1.4	6.03538	1.24517	5
SJ8	46	47	163	12.8	11	4.6	200100	1010.1	102.03	0.083	0.051	-200	1200	6.37	0.67	6.08161	0.739463	5
SJ8	127	47	183	21.2	50	3	202100	934.579	96.0783	0.127	0.06	200	1100	6.92	0.69	6.18898	0.824325	5
SJ8	128	47	229	53	99	151	201800	719.424	134.569	0.278	0.06	2740	610	9	1.7	6.32776	1.36925	5
SJ8	121	4	608	318	740	3170	299000	401.606	24.1932	0.522	0.05	4260	140	16.04	0.95	6.37946	1.15997	5
SJ8	136	99	205	54	103	84	176400	709.22	90.5387	0.28	0.11	500	1500	9.1	1.2	6.39579	1.50952	5
SJ8	145	120	936	133	213	42	979000	854.701	54.058	0.144	0.021	2210	280	7.54	0.48	6.60503	0.464858	5
SJ8	130	60	708	397	850	2150	319700	364.964	35.9636	0.537	0.053	4270	150	17.6	1.7	6.68488	1.43221	5
SJ8	144	120	1025	98	114	50	1086000	884.956	61.0854	0.088	0.017	1090	370	7.28	0.5	6.89528	0.501166	5
SJ8	129	47	499	286	760	680	198000	322.581	46.8262	0.555	0.053	4280	200	19.9	2.9	7.10832	1.77617	5
SJ8	119	120	1125	105	106	76	1176000	848.896	70.6213	0.093	0.013	1240	270	7.59	0.63	7.14005	0.607051	5
SJ8	143	120	1330	209	250	60	1065000	657.895	121.191	0.156	0.025	2290	290	9.8	1.8	8.43149	1.58412	5
SJ8	64	65	263	53	57	-2.2	164100	520.833	37.9774	0.205	0.055	2130	540	12.4	0.93	9.88264	1.12707	5
SJ8	93	94	1040	225	499	1590	530800	420.168	52.9624	0.225	0.024	2920	200	15.3	2	11.8616	1.57184	5
SJ8	89	90	1229	66	-8	-12	751000	502.765	19.2107	0.0546	0.0083	210	300	12.81	0.49	12.6749	0.502346	5
SJ8	55	56	231	62	97	1010	98700	348.432	32.7793	0.275	0.074	2160	650	18.5	1.8	13.1336	2.13711	5
SJ8	2	3	1000	114	172	1149	507200	431.034	20.437	0.112	0.013	1760	230	14.94	0.69	13.6982	0.695912	5
SJ8	13	14	223	62	112	3.5	89700	333.333	37.7778	0.269	0.065	3080	520	19.3	2.2	13.875	2.24575	5
SJ8	26	27	945	58.5	39	22	505000	447.628	16.0296	0.0576	0.008	420	270	14.38	0.52	14.1805	0.527947	5
SJ8	90	91	166	27.2	25	138	74600	361.011	36.4921	0.185	0.053	1790	650	17.8	1.8	14.7069	1.91122	5
SJ8	79	80	521	209	531	1065	155300	242.131	10.5529	0.392	0.034	3830	130	26.6	1.2	14.9619	1.40485	5
SJ8	87	88	715	41	37	7220	371100	423.549	16.863	0.057	0.013	330	390	15.2	0.61	14.9975	0.646899	5
SJ8	45	46	927	52.9	10	5.4	438700	395.413	14.5407	0.0575	0.0076	410	270	16.28	0.6	16.0535	0.610309	5
SJ8	116	117	449	43.6	33	-8.4	205700	371.747	19.3474	0.1	0.023	1040	500	17.31	0.93	16.1441	0.980209	5
SJ8	24	25	582	53.8	41	3	260100	374.532	19.6384	0.093	0.017	1290	370	17.22	0.93	16.1763	0.925486	5
SJ8	17	18	225	18.6	-7	2	100300	377.358	34.1759	0.081	0.026	670	660	17	1.5	16.314	1.57946	5
SJ8	50	51	679	54	40	-2	309100	375.94	18.373	0.079	0.018	930	460	17.15	0.82	16.4188	0.891917	5
SJ8	44	45	247	14.9	12	-2.7	112800	375.94	29.6795	0.065	0.03	-100	760	17.1	1.3	16.7219	1.4703	5
SJ8	28	29	286	42	133	2660	116400	334.448	31.3196	0.147	0.048	1540	620	19.3	1.8	16.7993	1.96099	5
SJ8	113	114	288	28.7	32	1400	126200	355.872	26.5954	0.102	0.028	1250	590	18.1	1.4	16.8179	1.41059	5
SJ8	94	95	178	50	79	30	55500	251.256	25.8832	0.295	0.081	2690	680	25.6	2.7	17.5633	3.20392	5
SJ8	48	49	818	41	11	131	352300	359.712	15.5271	0.05	0.011	90	380	17.91	0.8	17.815	0.80756	5
SJ8	41	42	3170	934	2270	4	945000	246.914	9.14495	0.295	0.017	3447	90	26.05	0.94	17.8721	0.933545	5
SJ8	18	19	756	115	193	360	273300	297.619	15.0581	0.146	0.023	2170	290	21.7	1.1	18.9038	1.14955	5
SJ8	118	119	785	352	910	2100	164900	168.634	16.7781	0.44	0.047	3990	180	38.1	3.8	19.1659	3.06849	5
SJ8	0	1	439	26	25	-0.2	169700	328.947	17.313	0.061	0.016	210	480	19.6	1	19.2074	1.08474	5
SJ8	39	40	1674	90.8	31	187	662900	328.731	10.4822	0.0532	0.0052	270	200	19.58	0.62	19.413	0.631668	5
SJ8	62	63	167	17.3	40	4.8	55340	268.817	26.0146	0.133	0.058	610	940	23.9	2.3	21.3208	2.70886	5
SJ8	57	58	1880	123	61	3	658400	292.227	8.53965	0.0629	0.0064	600	210	22.02	0.66	21.5654	0.654467	5
SJ8	117	118	294	58	84	162	83500	229.885	19.025	0.206	0.039	2670	400	28	2.3	22.3458	2.31758	5
SJ8	101	102	1235	110	118	25	404600	268.817	10.1168	0.088	0.012	1250	280	23.95	0.88	22.6821	0.928139	5
SJ8	27	28	189	22.8	60	434	58000	257.732	23.9133	0.113	0.041	700	820	25	2.3	22.8679	2.48418	5
SJ8	52	53	284	49	163	4660	76100	221.729	39.3312	0.182	0.048	1950	630	29	5.1	24.0472	4.61395	5
SJ8	69	70	603	47.5	13	10	173000	238.663	12.5313	0.083	0.015	1040	370	27	1.4	25.7145	1.44274	5
SJ8	74	75	721	327	809	13670	106400	122.249	9.86364	0.447	0.037	4060	120	52.5	4.2	25.9771	3.42019	5
SJ8	58	59	563	48.1	41	8	147700	217.865	9.01837	0.088	0.016	1040	380	29.5	1.2	27.9795	1.30286	5
SJ8	66	67	249	32.2	54	3230	54900	185.185	15.775	0.132	0.042	1280	750	34.7	2.9	30.9806	3.21806	5
SJ8	47	48	176	54	120	12	29210	135.87	16.2453	0.314	0.079	3070	650	47.2	5.6	31.3348	6.05951	5
SJ8	114	115	1580	105	60	84	374900	193.424	12.7203	0.071	0.011	680	270	33.2	2.2	32.223	2.16569	5
SJ8	4	5	167	24	80	11.5	29640	152.672	17.4815	0.172	0.08	300	1100	42	4.8	35.4423	5.87766	5
SJ8	10	11	592	52.4	35	61	120500	172.117	7.40607	0.086	0.016	1070	400	37.3	1.6	35.4978	1.7026	5
SJ8	70	71	1162	488	1024	10130	134300	93.5454	4.63789	0.415	0.036	3880	130	68.5	3.4	36.7381	3.85606	5
SJ8	36	37	121	16.5	54	4180	23800	158.983	17.6928	0.107	0.062	-300	1400	40.4	4.5	37.3541	5.21782	5
SJ8	78	79	780	60	68	326	153500	160.772	7.23731	0.082	0.019	780	420	40	1.8	38.1999	1.96684	5
SJ8	100	101	461	223	483	25	45430	80	7.68	0.454	0.047	3970	170	79.7	7.7	39.0011	6.29972	5
SJ8	25	26	1629	94.7	18	21	299100	155.28	4.82234	0.0576	0.0056	450	190	41.4	1.3	40.8218	1.29855	5
SJ8	34	35	2426	760	1640	3440	303400	102.669	4.11099	0.314	0.019	3545	100	62.5	2.5	41.4628	2.40608	5
SJ8	71	72	1078	451	1090	4390	114900	85.4701	8.03565	0.365	0.043	3640	200	74.9	7.2	44.9623	6.00023	5
SJ8	91	92	592	34.8	38	-14.1	86000	118.064	6.41196	0.059	0.016	140	520	54.4	2.9	53.5581	3.10064	5
SJ8	111	112	1260	94	40	96	123500	79.8722	3.50876	0.0726	0.0086	990	230	80.2	3.5	77.6936	3.5095	5
SJ8	15	16	1349	91	54	172	79300	50.5051	3.06091	0.0681	0.0081	850	240	126.6	7.4	123.308	7.53628	5
SJ8	103	104	3700	197	26	5	213000	46.8604	1.42733	0.0531	0.0047	310	160	136.1	4.1	135.385	4.17226	5
SJ8	105	106	4520	289	41	367	87400	15.625	0.488281	0.0626	0.0039	660	130	400	12	396.078	12.2937	5
SJ8	72	73	4470	396	347	2780	74300	13.587	0.369211	0.0881	0.007	1330	150	458	12	440.111	12.3648	5
SJ8	96	97	16360	1185	546	17230	240900	12.0627	0.232815	0.0711	0.0026	941	75	513.4	9.7	505.072	9.66564	5
SJ8	37	38	35200	3620	4090	24500	480000	11.4155	0.286691	0.1007	0.0046	1639	78	541	13	513.753	13.0096	5
SJ8	8	9	25270	1544	165	19090	355000	11.976	0.243824	0.0604	0.0022	621	80	516.8	10	515.297	10.3374	5
SJ8	109	110	28270	1697	238	800	411200	11.8483	0.238651	0.0598	0.0019	582	70	522.5	10	521.097	10.3183	5
SJ8	95	96	7980	487	96	8	115200	11.8203	0.27944	0.0614	0.0033	610	120	523.6	12	521.298	12.2116	5
SJ8	65	66	16730	965	52	7.2	240700	11.8624	0.25329	0.0576	0.0021	513	78	521.5	11	521.872	10.9599	5
SJ8	42	43	22200	1432	168	4.8	403000	11.6959	1.10803	0.0651	0.0023	768	76	526	48	524.364	48.5245	5
SJ8	61	62	51810	4030	2740	4360	727000	11.4943	0.2246	0.0768	0.0031	1102	81	537.5	10	525.789	10.2418	5
SJ8	80	81	15990	3580	7180	14830	181300	9.33707	0.174362	0.2238	0.0087	3010	59	655.9	12	527.545	13.1223	5
SJ8	7	8	25320	2239	2230	33100	334000	11.274	0.254204	0.0868	0.0034	1354	75	547.7	12	529.241	11.8897	5
SJ8	51	52	17930	1065	26	12	252800	11.655	0.230927	0.0587	0.0022	544	86	530.8	10	530.236	10.3504	5
SJ8	102	103	68100	3989	98	24	939000	11.3507	0.244795	0.0577	0.0017	509	64	544	11	544.755	11.5156	5
SJ8	115	116	7720	660	752	9720	103300	10.929	0.22694	0.0852	0.0043	1304	100	564.6	11	546.653	11.4761	5
SJ8	97	98	4050	530	840	1850	51400	10.1937	0.415644	0.116	0.017	1680	250	603	24	562.823	25.5949	5
SJ8	6	7	14010	818	35	0.8	181000	10.8696	0.24811	0.0581	0.0024	505	90	567.3	13	567.987	12.743	5
SJ8	132	60	2760	2300	5620	11200	172900	51.5464	3.71984	0.81	0.029	4984	65	123.8	8.6	4.10694	6.8808	4
SJ8	98	99	160	45	70	109	175900	909.091	107.438	0.35	0.16	1500	1400	7.07	0.86	4.36156	1.52974	4
SJ8	138	99	620	411	1110	1860	234600	317.46	36.2812	0.634	0.047	4580	140	20.3	2.3	5.19149	1.48954	4
SJ8	137	99	722	472	1160	5260	224400	253.807	12.8836	0.656	0.045	4630	110	25.4	1.3	5.78708	1.69266	4
SJ8	35	36	1242	1032	2640	11600	5740	3.89105	0.227104	0.832	0.038	5033	87	1469	78	8.91054	105.794	4
SJ8	63	64	1122	751	1970	2680	190600	138.889	5.01543	0.66	0.037	4635	87	46.2	1.7	10.3512	2.67875	3
SJ8	104	105	1620	152	77	30	1109000	561.798	126.247	0.083	0.012	1060	290	11.5	2.5	10.932	2.46146	3
SJ8	140	99	512	267	730	800	166600	263.852	42.467	0.478	0.065	4090	250	24.4	3.9	11.0727	2.74209	3
SJ8	85	86	227	163	363	162	16260	59.8802	5.37846	0.74	0.1	4770	260	106.5	9.5	13.1365	14.2239	3
SJ8	82	83	44	11.5	18	11	13990	258.398	60.7602	0.41	0.27	-3400	3900	24.8	5.8	13.4521	9.09016	3
SJ8	56	57	41	12.7	18	-1.8	20350	414.938	132.573	0.15	0.26	-4400	4900	15.5	4.9	13.4835	6.67657	3
SJ8	40	41	125	44.2	88	944	35500	242.131	31.6587	0.42	0.11	3230	810	26.5	3.5	14.0195	4.16198	3
SJ8	29	30	91	20.5	24	7.6	30200	271.739	39.1363	0.36	0.23	-400	2600	23.7	3.4	14.2912	7.20286	3
SJ8	108	109	2406	1771	4460	14620	169300	57.5043	1.4219	0.731	0.025	4806	56	111.1	2.7	14.9677	5.4324	3
SJ8	141	120	2300	598	1260	11580	949000	294.985	70.4832	0.291	0.035	3310	200	21.8	5.2	15.0707	3.73644	3
SJ8	60	61	980	280	610	1170	352900	301.205	78.9302	0.194	0.037	2260	550	21.3	5.6	17.382	4.66226	3
SJ8	9	10	1030	720	1980	365	64900	54.9451	8.15119	0.714	0.038	4785	88	116	17	18.2086	7.51476	3
SJ8	12	13	204	91	194	13	39100	163.934	34.9368	0.47	0.12	3610	510	38.9	8.2	18.2245	7.16367	3
SJ8	76	77	31	-1.7	2	-6	8470	222.222	93.8272	0.31	0.33	-5000	4800	29	12	19.3078	14.5742	3
SJ8	38	39	25.6	-0.2	7	0	5450	175.439	73.8689	0.42	0.72	-18000	14000	37	15	19.3509	34.3695	3
SJ8	84	85	221	68	193	7870	51630	194.932	34.5785	0.362	0.098	2200	1200	33	5.8	19.8387	5.42128	3
SJ8	32	33	506	324	893	8990	26480	44.2478	4.50309	0.72	0.055	4760	140	144	15	21.536	11.594	3
SJ8	20	21	1160	860	2310	1980	106000	66.2252	15.7888	0.66	0.071	4440	290	96	23	21.7655	10.6314	3
SJ8	92	93	3670	2850	7110	70700	121800	26.8817	1.30073	0.762	0.033	4877	74	235	11	22.75	13.5933	3
SJ8	14	15	169	134	382	-3.8	7440	37.594	7.77319	0.73	0.25	800	6400	168	34	23.2003	54.6268	3
SJ8	11	12	112	60	140	940	7530	56.8182	7.74793	0.67	0.17	3960	740	112	15	23.9494	24.8241	3
SJ8	31	32	413	251	700	2280	33900	68.9655	8.08561	0.632	0.061	4520	160	92	11	24.2161	8.26144	3
SJ8	54	55	278	114	280	104	43050	128.205	19.7239	0.441	0.063	3900	250	50.2	7.6	25.1505	5.65653	3
SJ8	142	120	3900	300	183	70	1106000	232.558	227.15	0.111	0.018	1590	300	27	26	25.4104	24.7942	3
SJ8	83	84	570	420	1190	319	28030	41.4938	12.2243	0.7	0.083	4640	230	152	44	26.9376	18.8722	3
SJ8	68	69	143	102	272	187	1441	8.26446	1.09282	0.81	0.17	5070	560	743	88	26.9789	170.12	3
SJ8	73	74	49	-7	1	-3	17640	273.224	63.4537	-0.09	0.2	-11700	5300	23.5	5.4	27.6099	8.73902	3
SJ8	81	82	237	43	86	3680	56500	196.078	42.2914	0.157	0.043	1140	840	32.5	6.8	28.2259	6.33732	3
SJ8	1	2	900	600	1540	4640	54240	51.0204	2.86339	0.658	0.035	4654	90	125.1	7.2	28.6148	7.11273	3
SJ8	75	76	29	17.2	34	-11	6350	181.818	76.0331	-0.09	0.57	-22000	16000	35	14	41.4529	30.7283	3
SJ8	49	50	2820	2240	5700	1000	89000	25.3165	5.31966	0.699	0.043	4700	120	254	52	44.7333	18.8439	3
SJ8	23	24	101	52	100	4	5647	49.2611	12.6186	0.48	0.34	-4000	7100	128	32	59.1056	57.8147	3
SJ8	5	6	631	521	1250	224	4390	5.55556	0.432099	0.796	0.058	4980	130	1073	76	63.7973	96.1324	3
SJ8	22	23	2070	223	296	5390	111400	46.2963	9.64506	0.105	0.013	1580	230	137	28	128.09	26.6069	2
SJ8	30	31	800	670	1760	123	1532	1.44928	0.567108	0.808	0.075	4980	170	2530	580	235.79	449.525	2
SJ8	21	22	16200	1620	1860	292	78100	4.23729	0.951594	0.0905	0.0051	1380	120	1280	270	1360.9	294.773	2
SJ8	43	44	119	107	244	8	1482	10.3093	1.16909	1.03	0.2	5410	480	591	68	-165.696	168	1
SJ8	16	17	91	74	191	1434	1589	14.7059	2.16263	1.06	0.23	5460	540	419	62	-131.39	134.564	1
SJ8	110	111	66	66	121	5	2312	29.4118	9.51557	1.06	0.56	-1200	7900	214	65	-63.9324	159.144	1
SJ8	106	107	482	420	1040	16000	14020	24.6305	2.42665	0.9	0.089	5170	210	256	25	-21.8427	32.0439	1
SJ8	77	78	146	90	243	2830	8230	47.3934	6.73839	0.95	0.33	4930	870	134	19	-19.9644	57.5118	1
SJ8	88	89	117	81	213	15	6250	45.4545	6.61157	0.89	0.24	4770	740	140	20	-9.88192	43.6854	1
SJ8	99	100	169	122	322	156	6320	30.8642	4.57247	0.86	0.15	5010	360	205	30	-6.54833	40.7719	1
SJ8	107	108	1079	920	2220	10900	18210	14.1044	0.915093	0.846	0.054	5080	120	441	28	-6.2059	36.9398	1
SJ8	33	34	306	265	750	317	7580	20.9644	3.91159	0.85	0.12	5070	360	297	54	-5.72181	48.6376	1
SJ8	67	68	168	111	227	-6.8	11270	55.8659	8.4267	0.85	0.23	4910	600	114	17	-2.11252	33.992	1
SJ8	53	54	42	29.2	77	-2	434	-	-	-	-	-	-	-	-	-	-	1
SJ8	112	113	139	152	294	3	137	-	-	-	-	-	-	-	-	-	-	1
Standards
Sugluk	0		218000	23350	64	-2.7	838000	3.25309	0.0603208	0.1063	0.0026	1734	46	1728	28
Sugluk	1		207100	22310	67	4.1	813000	3.31016	0.0613602	0.1062	0.0025	1732	43	1702	27
Sugluk	2		210800	22340	52	6	822000	3.29815	0.059828	0.10514	0.0024	1715	43	1707	27
Sugluk	3		206500	22340	134	-1.4	806000	3.26264	0.0574821	0.1055	0.0026	1726	41	1723	27
Sugluk	4		70200	7960	1380	344	269900	3.24992	0.059147	0.1121	0.0028	1839	42	1729	28			1
Sugluk	5		68500	7280	63	11.4	263100	3.28407	0.0603967	0.1057	0.0026	1728	44	1713	27
Sugluk	6		68100	7370	78	-5.7	263200	3.26371	0.0564545	0.1069	0.0027	1747	48	1723	26
Sugluk	7		68100	7320	28	8.6	265600	3.28299	0.0592793	0.1062	0.0027	1736	43	1714	27
Sugluk	8		69300	7450	119	4.3	271000	3.25733	0.0615391	0.1068	0.003	1750	50	1726	29
Sugluk	9		66600	7170	9	4.1	263500	3.29489	0.0586241	0.1066	0.0027	1742	45	1708	26
Sugluk	10		67600	7180	8	-3.1	263400	3.27761	0.0569366	0.1058	0.0026	1728	47	1717	26
Sugluk	11		67100	7270	12	-1.3	265600	3.28407	0.0560827	0.107	0.0027	1749	44	1713.2	26
Sugluk	12		219000	23440	19	2	861000	3.23206	0.0584989	0.1055	0.0025	1720	44	1737	27
Sugluk	13		216400	23200	30	6	847000	3.27011	0.0577456	0.1068	0.0025	1743	42	1717	22
Sugluk	14		210400	22680	34	-1	844000	3.29598	0.0554037	0.10618	0.0025	1733	43	1707.8	25
Sugluk	15		69300	7510	35	10	274800	3.25415	0.0593011	0.1058	0.0027	1725	47	1727	28
Sugluk	16		68200	7330	7	12	272000	3.27547	0.0579349	0.1053	0.0027	1716	46	1717	27
Sugluk	17		65400	7080	144	49	263800	3.31236	0.0592472	0.1066	0.0026	1738	44	1701	27
Sugluk	18		66900	7180	20	9	265400	3.26052	0.0584703	0.1062	0.0026	1731	46	1724	27
Sugluk	19		70100	7480	6	-17	278600	3.27976	0.0613141	0.1062	0.0028	1734	47	1715	28
Sugluk	20		66500	7270	17	-26	266200	3.27225	0.0567504	0.1066	0.0027	1738	47	1719	26
Sugluk	21		65500	6980	34	-6	260900	3.28192	0.0560091	0.1059	0.0026	1730	46	1714.5	26
Sugluk	22		64800	6980	220	76	258200	3.27869	0.0623488	0.1069	0.0028	1743	49	1716	29
Sugluk	23		204600	22010	1360	14	810000	3.23625	0.0544611	0.1065	0.0026	1737	44	1735.6	26
Sugluk	24		203100	21770	580	1	821000	3.32779	0.0586931	0.107	0.0026	1750	42	1693	26
Sugluk	25		210900	22700	197	2	842000	3.27654	0.0558257	0.1056	0.0025	1722	44	1717.2	26
Sugluk	26		213800	22960	184	5	861000	3.29598	0.0564901	0.1065	0.0024	1738	41	1708	26
R10	0		81300	6290	38	2.6	515000	5.3135	0.0988163	0.0753	0.0019	1075	53	1111	19
R10	1		83600	6490	57	9.6	519000	5.2521	0.0993044	0.07663	0.0019	1108	50	1124	19
R10	2		85500	6760	510	7.9	546000	5.37057	0.0922976	0.07732	0.0019	1126	49	1100.6	17
R10	3		86100	6500	231	21	549000	5.39374	0.101824	0.0752	0.0019	1070	51	1096	19
R10	4		80400	6220	-12	27	520000	5.38213	0.101386	0.076	0.0021	1089	55	1098	19
R10	5		82600	6390	9	15.8	527000	5.2521	0.0910291	0.0767	0.002	1112	50	1123.2	18
R10	6		78900	6010	26	13	515000	5.40541	0.0934989	0.0759	0.0019	1088	50	1094.2	18
R10	7		79700	6150	88	3	528000	5.42005	0.0969441	0.07556	0.0018	1080	49	1091.4	18
R10	8		78900	6090	25	-18	513000	5.36481	0.0920997	0.0758	0.0019	1085	50	1101.8	17
R10	9		79200	6070	43	-11.5	517000	5.33049	0.0937666	0.0754	0.0019	1077	51	1108.2	18
R10	10		79100	6140	169	-10	520000	5.36193	0.097751	0.07742	0.0019	1128	49	1102.2	18
R10	11		77000	5890	38	1	506000	5.37346	0.0923969	0.0761	0.002	1097	54	1099.9	18
R10	12		78600	6070	105	22	527000	5.46747	0.0956583	0.07559	0.0019	1088	50	1082.5	17
R10	13		81600	6280	19	7	524000	5.24109	0.0933947	0.076	0.0019	1090	50	1125.6	18
PCA	0		49000	5750	112	1.8	169900	2.90529	0.0582408	0.1173	0.0034	1908	52	1910	31
PCA	1		52100	6840	2390	-1.6	172700	2.81136	0.0608587	0.1304	0.0065	2097	86	1961	36			1
PCA	2		54400	11110	12100	15.8	170500	2.65957	0.0650747	0.204	0.014	2810	120	2056	43			1
PCA	3		51700	5940	33	-2.1	177200	2.92141	0.0580357	0.1148	0.0034	1869	54	1897	33
PCA	4		47300	5600	115	1.4	162700	2.918	0.0570488	0.119	0.0033	1936	49	1899	32
PCA	5		48600	5670	70	11.8	163800	2.89017	0.059307	0.1176	0.0034	1913	51	1915	34
PCA	6		45600	5460	83	11	163600	2.9824	0.0578158	0.1164	0.0031	1897	48	1864	31
PCA	7		48800	5710	24	5	170100	2.94031	0.0613826	0.1154	0.0033	1891	55	1887	34
PCA	8		50900	6060	50	16.4	175800	2.87522	0.0562147	0.1183	0.0032	1932	51	1924	33
PCA	9		49300	5830	13	8.8	173000	2.86615	0.0566823	0.1157	0.0032	1890	49	1929	33
PCA	10		50400	5770	37	27	172400	2.86944	0.062576	0.1145	0.003	1867	48	1927	36
PCA	11		48000	5650	75	22	167900	2.91971	0.0579679	0.1168	0.0032	1908	48	1898	33
PCA	12		40800	4880	120	15	145200	2.90529	0.0514882	0.1175	0.0032	1917	49	1907	29
PCA	13		41500	4850	23	-10	147900	2.90613	0.0532073	0.1151	0.003	1878	47	1906	30
PCA	14		42100	4880	53	18	148300	2.93427	0.0576867	0.1144	0.0028	1871	42	1894	30
PCA	15		40500	4800	35	-2	144800	2.93255	0.058479	0.1156	0.0032	1889	53	1894	32
PCA	16		84900	9980	315	28	301800	2.92826	0.0531631	0.1151	0.0029	1878	45	1893	30
PCA	17		84600	10220	1010	610	306500	2.97	0.0608643	0.1189	0.0033	1939	47	1870	33
PCA	18		91100	10930	36	14	327800	2.93513	0.0559976	0.117	0.003	1911	46	1890	31
PCA	19		83100	9880	231	19	308700	3.00752	0.0606026	0.1179	0.003	1921	46	1850	33
PCA	20		29920	3420	9	-9	108400	2.96472	0.0624059	0.1131	0.0036	1855	63	1873	34
PCA	21		29900	3410	36	-4	107200	2.97089	0.0609005	0.1128	0.0032	1850	51	1870	33
PCA	22		26600	3127	25	-11	98900	3.02206	0.0611901	0.1144	0.0033	1880	53	1845	31
PCA	23		27540	3280	22	0	104100	3.05998	0.0617988	0.1153	0.0036	1876	57	1822	32
PCA	24		44100	5370	610	33	159300	2.96472	0.0641638	0.1197	0.0035	1945	52	1873	35
PCA	25		44800	5240	37	20	161200	2.93686	0.0586509	0.1167	0.0031	1900	49	1889	33
PCA	26		46300	5440	44	1	166000	2.93945	0.0535702	0.1151	0.0032	1887	51	1887	30
PCA	27		87600	10360	500	29	319000	2.99491	0.0556108	0.1175	0.003	1927	46	1857	30
